# Supplementary material for: Firm Size and Corporate ESG Disclosure: Exploring the moderating effect of the institutional environment in China
Source: Research Square preprint supplement (doi:10.21203/rs.3.rs-7699657/v1), 2025-11-13

## Cover Letter

Dear Editor,

We are pleased to submit a manuscript entitled '**Firm Size and Corporate ESG Disclosure: Exploring the moderating effect of the institutional environment in China**' for your consideration of publication in *Humanities & Social Sciences Communications*. The authors are Yixi Zhang, Xiaoqian Wang\* and Yiran Tao.

Unique and Valuable: In this manuscript, we investigated the relationships between firm size and ESG disclosure. Although the firm size and ESG disclosure have attracted great attention in the global academic circles, to the best of the authors' knowledge, the perspective of capital market information demand and impact of institutional environment on this relationship have been neglected. This study specifically focuses on two important aspects of the institutional environment: government intervention and the development of legal environment. This study assists the Chinese government in creating a more robust institutional environment that is conducive for large companies to play a demonstration role in driving the improvement of ESG information transparency in the entire capital market.

We hope that you and the reviewers of *Humanities & Social Sciences Communications* will find the manuscript interesting and our contribution useful. We reconfirm that our current article is new and unpublished.

Thank you for your kind consideration.

Yours sincerely,

Yixi Zhang

# **Firm Size and Corporate ESG Disclosure: Exploring the moderating effect of the institutional environment in China**

## **Author details**

### **Yixi Zhang<sup>1</sup>**

School of Economics and Management  
Chongqing Electric Power College,  
Chongqing, China  
Email: [zhangyixi24@outlook.com](mailto:zhangyixi24@outlook.com)

### **Xiaoqian Wang<sup>\*</sup>** (Corresponding Author)

School of Finance, Commerce, and Trade  
Chongqing Jianzhu College,  
Chongqing, China  
Email: [wangxiaoqian@cqjzc.edu.cn](mailto:wangxiaoqian@cqjzc.edu.cn)

### **Yiran Tao<sup>3</sup>**

School of Smart Finance and Economics,  
Chongqing City Management College,  
Chongqing, China  
Email: [tyrelaine@gmail.com](mailto:tyrelaine@gmail.com)

## **Funding**

This research is Supported by the Science and Technology Research Program of Chongqing Municipal Education Commission (Grant No. KJQN202503314)

## **Author Contributions**

Conceptualization, Y.Z.; Methodology, Data curation and Formal analysis, Y.Z. and X.W.; Investigation, Resources, Software and Validation, Y.Z. and X.W.; Writing original draft preparation, Y.Z., X.W. and Y.T; supervision, Y.Z., X.W. and Y.T.

## **Data availability**

The data are available from the corresponding author upon reasonable request.

## **Competing interests**

The authors declare no competing interests.

## **Ethical approval**

This article does not contain any studies with human participants performed by any of the authors.

## **Informed consent**

This article does not contain any studies with human participants performed by any of the authors.

## **Certificate**

This is to certify that Tao Yiran is a faculty member of the School of Smart Finance and Economics at Chongqing City Management College, where she holds a teaching position. She is engaged in academic instruction and contributes to the educational activities within the department.

For any further inquiries or verification, please feel free to contact the institution at the following telephone number: +8613996098178.

Sincerely,

**Dean Professor Haung Jvying**



**School of Smart Finance and Economics**

**Chongqing City Management College**

**24/09/2025**

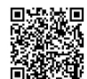

## **Certificate**

This is to certify that Wang Xiaoqian is a faculty member of the School of Finance, Commerce, and Trade at Chongqing Jianzhu College, where she holds a teaching position. She is engaged in academic instruction and contributes to the educational activities within the department.

For any further inquiries or verification, please feel free to contact the affiliated institution at the following telephone number:  
+8619923700156.

**Chongqing Jianzhu College**

**School of Finance, Commerce and Trade**

**22/09/2025**

**Dean's Signature:**

A handwritten signature in black ink, appearing to be a stylized representation of the Chinese characters '王' (Wang) and '小' (Xiao), followed by a long horizontal stroke.

## Certificate

This is to certify that Zhang Yixi is a faculty member of the School of Economics and Management at Chongqing Electric Power College, where she holds a teaching position. She is engaged in academic instruction and contributes to the educational activities within the department.

For any further inquiries or verification, please feel free to contact the institution at the following telephone number: +8613509400210.

Sincerely,

Dean Associate Professor Sun Young   
School of Economics and Management  
Chongqing Electric Power College  
24/09/2025

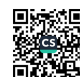

Supplement: Supplementary file 1 [file 2bd3b69f7f0f59a6cfe35b83.pdf]
