# Supplementary material for: Firm Size and Corporate ESG Disclosure: Exploring the moderating effect of the institutional environment in China
Source: Research Square preprint supplement (doi:10.21203/rs.3.rs-7699657/v1), 2025-11-13
Supplement: Supplementary file 1 [file 7b04f7a4d4aa652992911745.docx]

**Appendix B.** Correlation Matrix.

| Variables | 1 | 2 | 3 | 4 | 5 | 6 | 7 | 8 | 9 |
| --- | --- | --- | --- | --- | --- | --- | --- | --- | --- |
| 1 ESG | 1.000 |  |  |  |  |  |  |  |  |
| 2 Size | 0.194*** | 1.000 |  |  |  |  |  |  |  |
| 3 GOV | 0.067*** | -0.081*** | 1.000 |  |  |  |  |  |  |
| 4 LAW | 0.096*** | -0.060*** | 0.599*** | 1.000 |  |  |  |  |  |
| 5 Liquid | 0.089*** | -0.344*** | 0.066*** | 0.094*** | 1.000 |  |  |  |  |
| 6 Indep | 0.056*** | -0.022*** | 0.025*** | 0.025*** | 0.012 | 1.000 |  |  |  |
| 7 SOE | 0.069*** | 0.366*** | -0.152*** | -0.132*** | -0.170*** | -0.055*** | 1.000 |  |  |
| 8 Big4 | 0.111*** | 0.300*** | 0.031*** | 0.025*** | -0.035*** | 0.020*** | 0.093*** | 1.000 |  |
| 9 Mshare | 0.104*** | -0.363*** | 0.160*** | 0.129*** | 0.241*** | 0.066*** | -0.437*** | -0.110*** | 1.000 |

Notes: ***, ** and * represent the significance levels at 1%, 5% and 10%
