# Supplementary material for: Firm Size and Corporate ESG Disclosure: Exploring the moderating effect of the institutional environment in China
Source: Research Square preprint supplement (doi:10.21203/rs.3.rs-7699657/v1), 2025-11-13
Supplement: Supplementary file 2 [file a1bb7f2aae95d621f354aa2a.docx]

**Appendix A.** Distribution of firms by sectors between 2018-2022

| Sector | 2018 | 2019 | 2020 | 2021 | 2022 | Total | (%) |
| --- | --- | --- | --- | --- | --- | --- | --- |
| Agriculture, forestry, animal husbandry and fishery | 35 | 35 | 38 | 40 | 40 | 188 | 1.00% |
| Mining | 61 | 66 | 67 | 70 | 70 | 334 | 1.78% |
| Manufacturing | 2120 | 2167 | 2402 | 2807 | 3150 | 12646 | 67.21% |
| Energy | 102 | 94 | 101 | 118 | 118 | 533 | 2.83% |
| Construction | 85 | 79 | 88 | 93 | 96 | 441 | 2.34% |
| Wholesales and retail trade | 145 | 145 | 142 | 162 | 171 | 765 | 4.07% |
| Transportation, warehousing and postal services | 87 | 89 | 89 | 93 | 97 | 455 | 2.42% |
| Hotel and catering sectors | 7 | 7 | 8 | 8 | 8 | 38 | 0.20% |
| Information technology | 239 | 262 | 303 | 340 | 396 | 1540 | 8.18% |
| Real estate | 109 | 104 | 106 | 103 | 106 | 528 | 2.81% |
| Leasing and business service | 45 | 48 | 50 | 56 | 61 | 260 | 1.38% |
| Scientific research and technical services | 48 | 50 | 53 | 77 | 106 | 334 | 1.78% |
| Water, environment and utilities management | 45 | 48 | 65 | 79 | 87 | 324 | 1.72% |
| Residential services, repairs and other services | 1 | 1 | 1 | 1 | 1 | 5 | 0.03% |
| Education | 3 | 8 | 8 | 12 | 11 | 42 | 0.22% |
| Health and social work | 9 | 11 | 11 | 11 | 14 | 56 | 0.30% |
| Culture, sports and entertainment | 51 | 52 | 49 | 53 | 55 | 260 | 1.38% |
| Social security and social organization | 17 | 15 | 12 | 10 | 12 | 66 | 0.35% |
| Total | 3209 | 3281 | 3593 | 4133 | 4599 | 18815 | 100% |
